# Supplementary material
Source: publisher figshare collection journal article supplement (https://acs.figshare.com/ndownloader/files/19801388)
Supplement: Supplementary file 1 [file 19801388]

# Overlooked Role of Carbonyls of Natural Organic Matter on the Dissolution of Zinc Oxide Nanoparticles

Guishui Zhang, Daojian Tang, Ya Wang and Jiahai Ma\*

*University of Chinese Academy of Sciences, Beijing 100049, China*

*Email: majia@ucas.ac.cn*

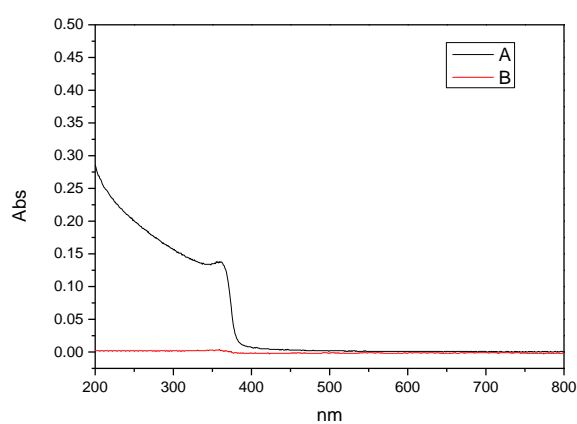

**Fig. S1** UV-vis absorption (A: 75  $\mu$ M ZnO NPs in Ultrapure water; B: The solution of 75  $\mu$ M ZnO NPs in Ultrapure water was centrifuged)

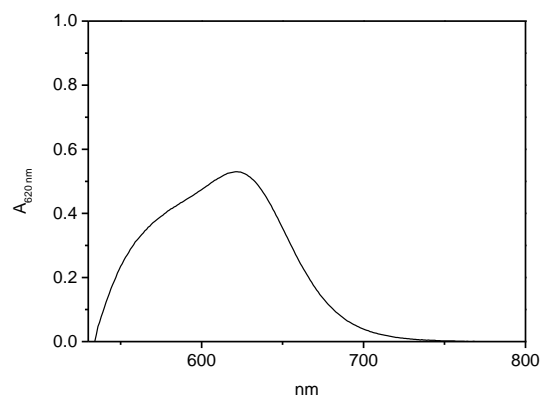

**Fig. S2** The absorption of  $\text{Zn}^{2+}$  reacted with Zincon, Specific absorption peak was generated at 620nm.

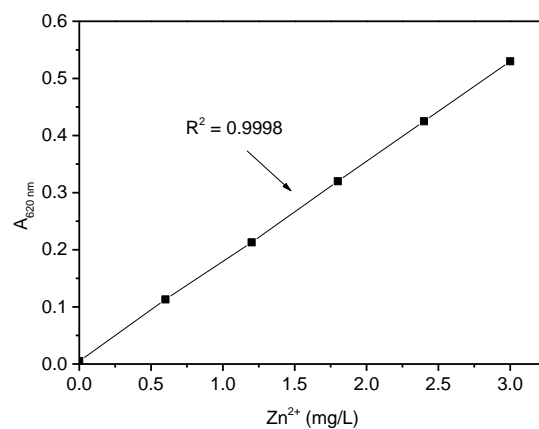

**Fig. S3** The concentration of  $\text{Zn}^{2+}$  standard solutions were measured by zincon (0, 0.6, 1.2, 1.8, 2.4, 3.0 mg/L) ( $\text{Zn}(\text{NO}_3)_2 \cdot 6\text{H}_2\text{O}$  was quantitatively weighed and dissolved in ultra-pure water to make  $\text{Zn}^{2+}$  standard solution).

Fig. S3 shows the absorption of  $\text{Zn}^{2+}$  reacted with Zincon, with a specific absorption peak at 620 nm. We used zincon method to measure the concentration of  $\text{Zn}^{2+}$  standard solution (0, 0.6, 1.2, 1.8, 2.4, 3.0 mg/L) ( $\text{Zn}(\text{NO}_3)_2 \cdot 6\text{H}_2\text{O}$  was quantitatively weighed and dissolved in ultra-pure water to make  $\text{Zn}^{2+}$  standard solution), and the linear correlation  $R^2=0.9998$  (Fig. S3).

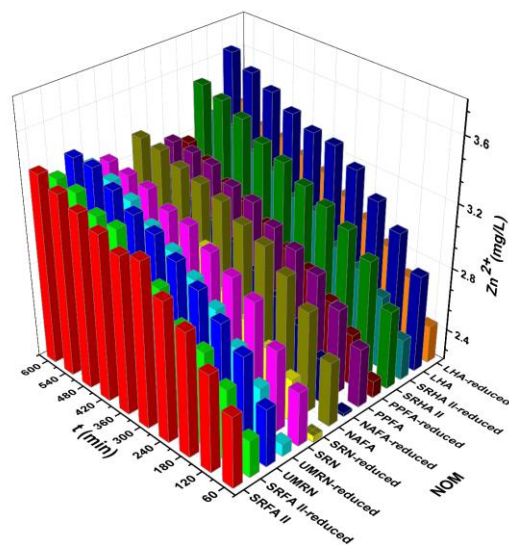

**Fig. S4** Dissolution of ZnO NPs to  $Zn^{2+}$  versus time with the original NOM and  $NaBH_4$ -reduced NOM in the presence of  $75 \mu M$  ZnO NPs and  $5 \text{ mg C/L}$  NOM.

| NOM     | Statistics<br>Adj. R-Square | NOM-reduced | Statistics<br>Adj. R-Square |
|---------|-----------------------------|-------------|-----------------------------|
| SRFA II | 0.93131                     | SRFA II     | 0.87268                     |
| UMRN    | 0.98571                     | UMRN        | 0.93379                     |
| SRN     | 0.95022                     | SRN         | 0.96298                     |
| NAFA    | 0.86843                     | NAFA        | 0.93                        |
| PPFA    | 0.9192                      | PPFA        | 0.96853                     |
| SRHA II | 0.9892                      | SRHA II     | 0.97461                     |
| LHA     | 0.9219                      | LHA         | 0.92574                     |

**Table S1** The linear correlation of dissolution curves of figure 3
